# Supplementary material
Source: PubMed Central journal article supplement (PMC1356362)
Supplement: 7600919s2.pdf [file 7600919s2.pdf]

**Suppl. Table 1: Primer pairs used for real-time PCR:**

|               |                                                                   |
|---------------|-------------------------------------------------------------------|
| Rpl19         | F: 5'-AAATCGCCAATGCCAACTC<br>R: 5'-TCTTCCCTATGCCCATATGC           |
| actin $\beta$ | F: 5'-AGGTGTGCACCTTTTATTGGTCTCAA<br>R: 5'-TGTATGAAGGCTTTGGTCTCCCT |
| IFN $\beta$   | F: 5'-CATTCGGAAATGTCAGGAGC<br>R: 5'-TGGAGCATCTCTTGGATGG           |
| IP10/cxcl10   | F: 5'-CTGCAACTGCATCCATATCG<br>R: 5'-CAATGATCTCAACACGTGGG          |
| RANTES        | F: 5'-GCCCACGTCAAGGAGTATTTCTA<br>R: 5'-ACACACTTGGCGGTTCCCTTC      |
| ISG15         | F: 5'-CAGGACGGTCTTACCCTTTCC<br>R: 5'-AGGCTCGCTGCAGTTCTGTAC        |
| ISG56         | F: 5'-TGCTGAGATGGACTGTGAGG<br>R: 5'-CTCCACTTTCAGAGCCTTCG          |
| GRIP1         | F: 5'-AACTTCGATGGCCTTGAGG<br>R: 5'-CTTCTGCTCCAGCATTATGC           |
| cMyc          | F: 5'-CAAGTTGGACAGTGGCAGGG<br>R: 5'-AGACGTTGTGTGTCCGCCTC          |
| MCP1          | F: 5'-AGGTCCCTGTCATGCTTCTG<br>R: 5'-TGGGATCATCTTGCTGGTG           |
| cycD1         | F: 5'-TGGTGAACAAGCTCAAGTGG<br>R: 5'-GCAGGAGAGGAAGTTGTTGG          |
| COX2          | F: 5'-TCCTCACATCCCTGAGAACC<br>R: 5'-AAGTGGTAACCGCTCAGGTG          |
| MIP2/cxcl2    | F: 5'-GCTGTTGTGGCCAGTGAAC<br>R: 5'-GCTTCAGGGTCAAGGCAAAC           |
