# Supplementary material
Source: PubMed Central journal article supplement (PMC1356362)
Supplement: 7600919s4.pdf [file 7600919s4.pdf]

|      | IRF3                   | IRF5                     | IRF7                     | IRF4                     | IRF6                     | IRF8                     | IRF9                     |
|------|------------------------|--------------------------|--------------------------|--------------------------|--------------------------|--------------------------|--------------------------|
| IRF3 | 179<br>0               | <b>28%</b><br><b>44%</b> | <b>25%</b><br><b>41%</b> | <b>23%</b><br><b>40%</b> | <b>22%</b><br><b>45%</b> | <b>22%</b><br><b>41%</b> | <b>21%</b><br><b>37%</b> |
| IRF5 | <b>54</b><br><b>85</b> | 186<br>0                 | 26%<br>46%               | 33%<br>51%               | 61%<br>79%               | 35%<br>52%               | 25%<br>40%               |
| IRF7 | <b>48</b><br><b>79</b> | 52<br>91                 | 190<br>0                 | 21%<br>39%               | 27%<br>44%               | 19%<br>37%               | 20%<br>37%               |
| IRF4 | <b>43</b><br><b>74</b> | 63<br>96                 | 42<br>75                 | 171<br>0                 | 33%<br>50%               | 37%<br>53%               | 29%<br>45%               |
| IRF6 | <b>43</b><br><b>86</b> | 115<br>148               | 54<br>89                 | 62<br>94                 | 184<br>0                 | 34%<br>52%               | 25%<br>40%               |
| IRF8 | <b>41</b><br><b>76</b> | 66<br>97                 | 39<br>74                 | 68<br>97                 | 64<br>97                 | 178<br>0                 | 26%<br>45%               |
| IRF9 | <b>38</b><br><b>68</b> | 47<br>76                 | 40<br>71                 | 50<br>78                 | 47<br>75                 | 47<br>81                 | 166<br>0                 |

**Suppl. Fig. 2 Sequence similarity between human IRF3 IAD (190-369) and corresponding regions of other human IRF family members.** Full-length sequences for human IRF 3-9 were aligned by CLUSTALX and imported into multiple alignment annotation program GeneDoc. Similarity matrix has been generated for the region of alignment, aa 190-369 of the human IRF3. The percentage of identical and conserved residues for each pairwise comparison is shown in the upper-right half of the matrix, whereas their number is shown in the lower-left half of the matrix. The diagonal represents the length of aligned fragments.
