# Supplementary material
Source: PubMed Central journal article supplement (PMC1356362)
Supplement: 7600919s5.pdf [file 7600919s5.pdf]

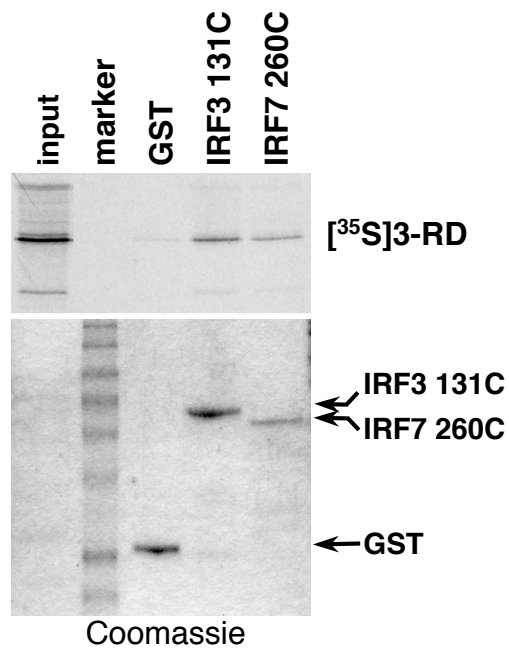

**Suppl. Fig. 3 IRF7 IAD interacts with GRIP1 *in vitro*.** *In vitro* produced GRIP1 3-RD (autoradiogram, top) was tested for binding to recombinantly expressed purified GST, GST-IRF3 131C and GST-IRF7 260C (IAD) (Coomassie blue staining, bottom).
